# Supplementary material
Source: PubMed Central journal article supplement (PMC2234167)
Supplement: pnas_0711209105_1.pdf [file pnas_0711209105_1.pdf]

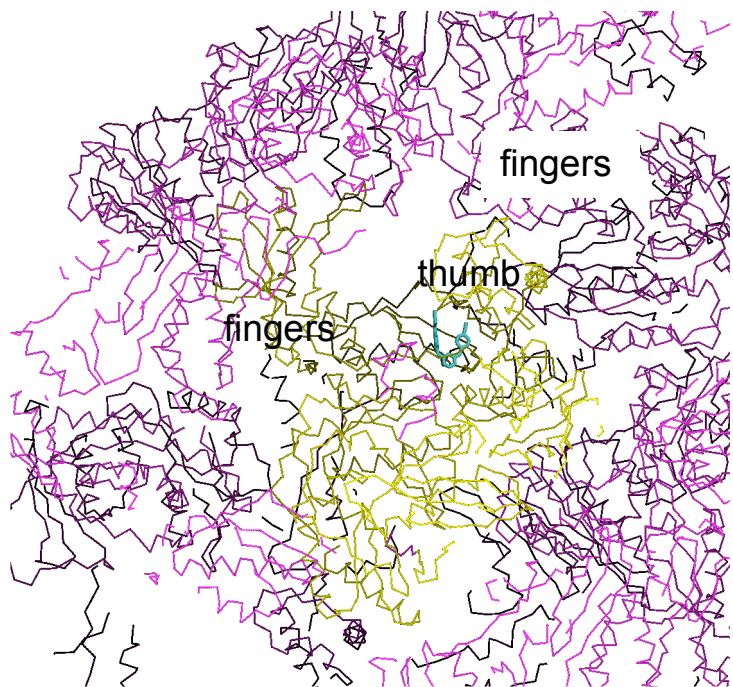

A

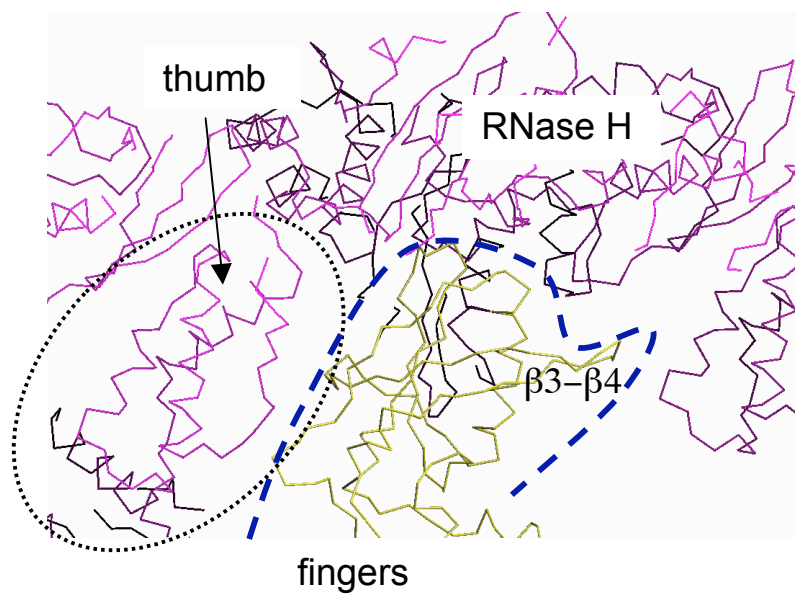

B

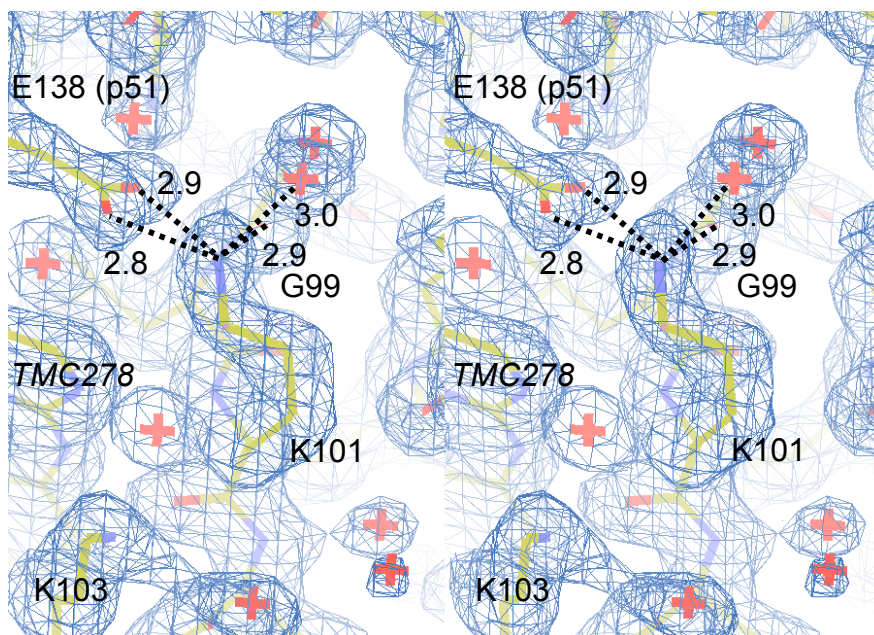

**Fig. S2.** Stereoview of the region surrounding amino acid residues K101 and K103 of the wild-type HIV-1 RT/TMC278 complex. The electron density map calculated at 1.8 Å resolution demonstrates accurate positioning of the side chains and solvent molecules. A striking feature is that the K101 N $\zeta$  atom makes close contacts with four oxygen atoms (represented by dotted lines), including a bifurcated hydrogen bond with the carboxylate oxygens of p51 residue E138.

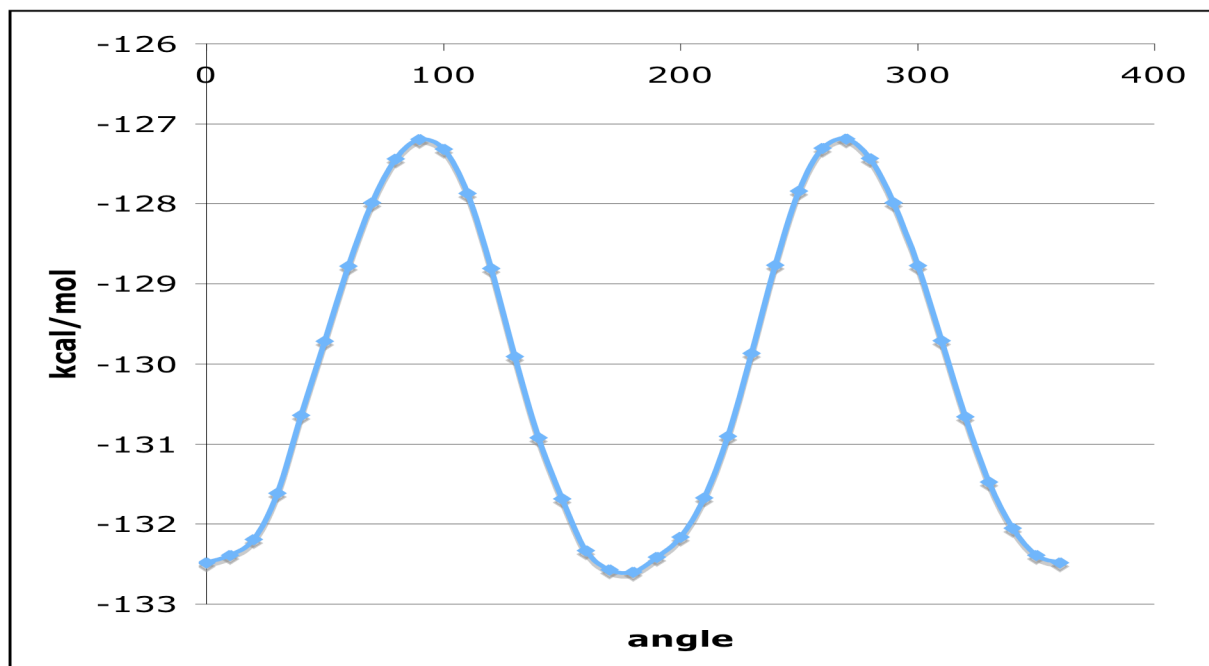

**Fig. S3:** Plot of total energy calculated for a free TMC278 molecule while varying the torsion angle  $\tau_5$ . The conformation of TMC278 molecule from the wild-type RT/TMC278 structure was used as starting model. In the energy minimization, the torsion angle  $\tau_5$  was rotated from 0 to 360° in steps of 10° and each conformation was energy minimized keeping other four rotatable torsion angles ( $\tau_1$ – $\tau_4$ ) fixed; the energy minimization was carried out using program MACROMODEL in the software package Schrödinger V8.0 (<http://www.schrodinger.com/>).
