# Supplementary material
Source: PubMed Central journal article supplement (PMC2234167)

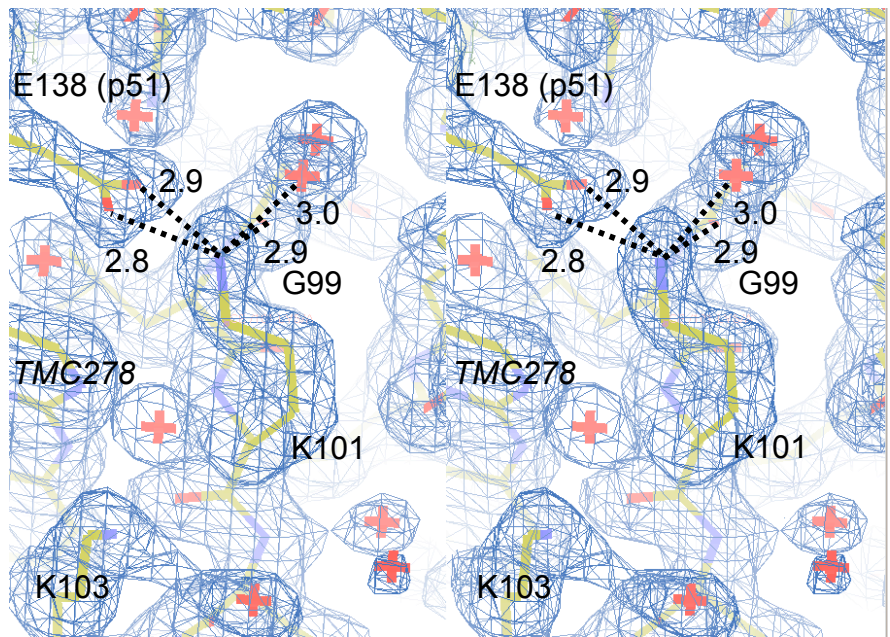

Supplement: pnas_0711209105_2.pdf [file pnas_0711209105_2.pdf]

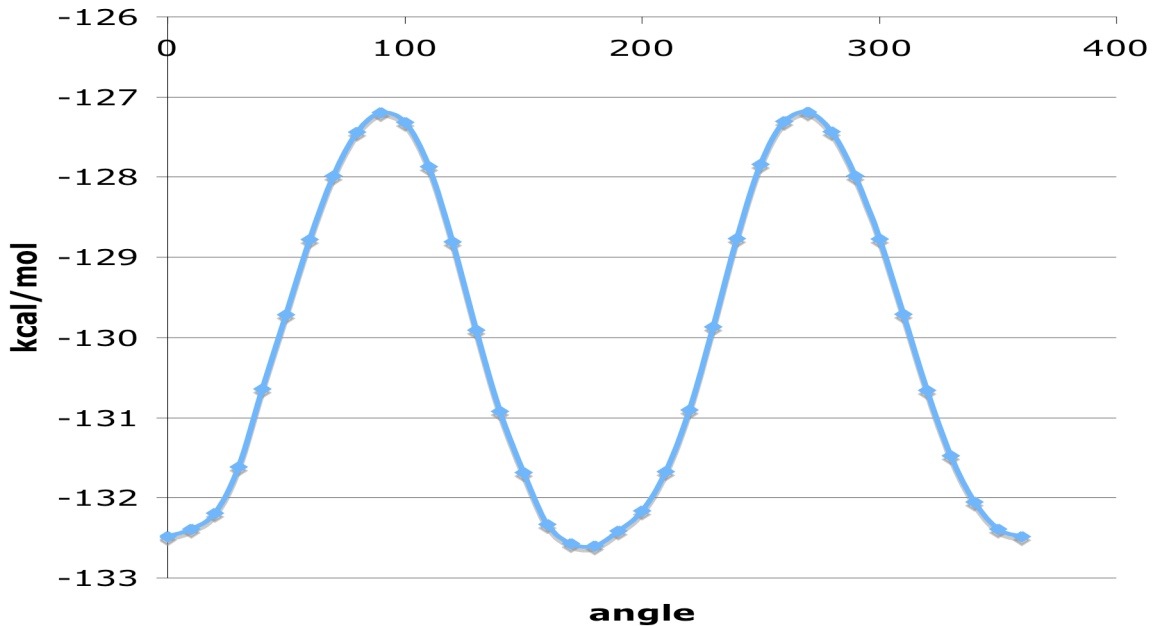

Supplement: pnas_0711209105_3.pdf [file pnas_0711209105_3.pdf]
